# Supplementary material for: Exploring the influence of judging experience on individual differences in figure skating jump performance evaluations: A case study of novice judges
Source: Research Square preprint supplement (doi:10.21203/rs.3.rs-4661368/v1), 2025-11-28
Supplement: Supplementary file 1 [file bdb7c60859360afb02361fb3.docx]

Exploring the influence of judging experience on individual differences in figure skating jump performance evaluations: A case study of novice judges

Judges in figure skating are tasked with the proper evaluation of the skater's grade of execution (GOE) score. While prior research found that judging accuracy is strongly impacted by previous experience as an athlete, the influence of judging experience on individual differences in evaluation remains unclear. This study investigated how the experience of a novice judge affected their evaluation process. The participants were judges and skaters with similar athletic abilities (n = 3 per group), and individual differences in (1) judging accuracy, (2) gaze coordinates, and (3) intraclass correlations were analyzed. The results revealed that limited judging experience did not significantly affect judging accuracy or individual variability in final GOE scores. However, for five of the six GOE criteria, individual differences were smaller in the judge group than in the skater group.
The judge group also showed greater consistency in gaze coordinates during jump evaluation, suggesting that consistency in evaluation for each GOE criterion may be linked to the consistency of gaze coordinates. These findings highlight the potential value of incorporating guidance that promotes consistent visual focus and attentional strategies into judge training programs.

**Keywords:** sports officials, double Axeljump, linear mixed model, intraclass correlation coefficients

# Introduction

Before 2002, figure skating competitions utilized the “6.0 judging system,” where judges awarded scores between 0.0 and 6.0 in 0.1 increments, to evaluate figure skaters based on technical merit and presentation. The median ordinal rankings of these scores determined their rankings. Although the median-rank-based system provides safeguards against manipulation by a minority of judges (Bassett & Persky, 1994), Zitzewitz (2006) suggested that this may also facilitate vote trading. Indeed, the 1998 and 2002 Olympics saw a significant rise in vote-trading scandals, prompting the International Skating Union (ISU) to introduce changes to the judgment system (Zitzewitz, 2014).

Under the current scoring system, the successful execution of high-difficulty jumps such as quadruple jumps became crucial, leading to an observed increase in their attempted frequency (Rauer et al., 2022). The jump technical score is calculated from the base value, which represents the difficulty, and the grade of execution (GOE) score, which indicates the quality of the technique. The base value is a predetermined score based on the type of jump and the number of rotations (e.g., performing a double Axel jump [2A] results in 3.30 points) (International Skating Union, 2018). The GOE score for jump quality is evaluated using an 11-point scale ranging from −5 to +5, including 0. One of the features of the new figure skating scoring system is to evaluate jump quality based on positive aspects rather than utilizing point deductions from a perfect score. Table 1 shows the GOE criteria used to assign performance points for jumps. The general guidelines are as follows: +1 = 1 bullet, +2 = 2 bullets, +3 = 3 bullets, +4 = 4 bullets, + 5 = 5 or more bullets. For +4 and +5 scores, the first three bullets (shown in bold in Table 1) must be present (International Skating Union, 2018). In the positive evaluation criteria, the term “very good” is used to describe height and distance rather than simply indicating that these values are “large.” Previous research has shown that jumps with a greater horizontal and landing distance, rather than vertical height, tend to receive higher GOE scores in ladies’ double Axel jumps (Hirosawa, 2025, November 10; Hirosawa et al., 2022). In addition, descriptors such as “unexpected” and “creative” allow for broader interpretive flexibility. Given these criteria, figure skating judges are expected to assess jump quality swiftly and accurately, as their assessments directly affect competition outcomes.

Table 1 GOE scoring guidelines for the positive aspects of jumps.

| GOE criterion positive aspect |
| --- |
| **1) Very good height and very good length** |
| **2) Good take-off and landing** |
| **3) Effortless throughout** |
| 4) Steps before the jump, unexpected or creative entry |
| 5) Very good body position from take-off to landing |
| 6) Element matches the music |

NOTE: For +4 and +5, the first three bullets highlighted in bold must be present (International Skating Union, 2018). GOE, grade of the execution

Figure skating, like gymnastics, is a scoring sport dependent on the ability of judges to evaluate athletic skills.　Machida (2020) proposed the distinction between “artistic sports” and “formalistic sports,” where the former involves interpretative acts of artistic expression in addition to technical execution, while the latter focuses solely on the perfection of techniques. In this definition, the technical evaluation criterion of artistic sports should ideally minimize room for interpretation. MacMahon & Mildenhall (2012) pointed out that human judgment can be vulnerable to errors when the tasks surpass cognitive capacity. Furthermore, biases influence judges in figure skating (Findlay & Ste-Marie, 2004; Vincent Dumoulin, 2020). As such, this leaves us with a crucial question: how should novice judges gain the experience necessary to make accurate and immediate judgments based on the evaluation criteria?

Although sports science research has traditionally focused on athletes and coaches, recent studies show a growing interest in sports officials and their decision-making processes (Hancock et al., 2015; Plessner et al., 2023). Researchers have primarily investigated how experience affects the accuracy of sports officials’ judgments and visual behaviors.

The demand placed on sports officials varies across disciplines. Prior research classified officials as “reactors,” “monitors,” and “interactors” depending on the required level of physical activity, athlete interaction, and the number of cues involved in decision-making (MacMahon et al., 2014). Within this framework, monitors are defined as officials with low-to-medium levels of physical demand and interaction with athletes who are required to process a medium-to-large number of visual cues during evaluation, typical of judges in sports such as gymnastics. This classification also closely aligns with figure skating judges, who must assess numerous technical and artistic cues simultaneously while having minimal physical involvement.

Hancock et al. (2021) noted that most research reports on sports officiating have focused on interactors, with few studies on reactors or monitors. Ziv et al. (2020) suggested that knowledge transfer may be possible among sports officials for cases with similar job descriptions, although Kittel et al. (2019) cautioned that such generalization may not always hold across different sports contexts. Thus, further research is needed to develop and validate methods for assessing the decision-making performance of officials across a broader range of sports. To date, most studies of monitors have focused on gymnastics, underscoring the need to extend such investigations to other judged sports, including figure skating.

Pizzera & Raab (2012) reported that the effects of officiating, motor, and visual experience on judging accuracy varied across sports. Among monitors, such as trampoline judges, motor experience as an athlete most strongly influenced judging accuracy, whereas officiating or visual experience showed minimal impacts. Similarly, Pizzera (2012) found that in artistic gymnastics balance beam judging, judges with specific motor experience (SME) in the task more accurately detected joint angles compared with judges without SME. In contrast, for the vault event, no significant differences in judgment accuracy were observed between SME and non-SME judges (Pizzera et al., 2018).

Other studies examining gymnastics judging accuracy and visual behavior across different participant groups, such as amateurs, athletes, coaches, and judges, have reported mixed findings (Flessas et al., 2015; Luis del Campo & Espada Gracia, 2018; Mack, 2020; Mack et al., 2021; Ste-Marie, 2000). Beyond gymnastics, visual-behavior differences linked to experience level have also been reported. For example, in dressage, judges of all experience levels focused longest on the horse’s forehand during Grand Prix performances, but experts devoted more attention to the horse’s legs, whereas novices focused more on the rider (Wolframm et al., 2024).

In figure skating, Hirosawa et al. (2023) reported no significant differences in GOE judging accuracy between judges and skaters with comparable athletic experience, suggesting that athletic experience might have a greater influence on the judging accuracy of monitors compared with judging itself. Conversely, Avugos et al. (2021) highlighted the fact that most officiating studies overlooked variability among individuals, which is important for referee selection, development, and performance evaluations.

Given the subjective nature of positive GOE criteria in figure skating, assessing whether judging experience could reduce individual differences is critical. Therefore, the present study examined whether novice-level judging experience decreases individual differences in GOE scoring among judges and skaters with similar athletic abilities, which could otherwise act as a confounding factor.

# Materials and Methods

This study was conducted in accordance with the principles of the Declaration of Helsinki and was approved by the Ethics Committee of Anonymous University (protocol codes anonymous).

## Participants

The participants included three judges (one male and two females) and three skaters (three females), who were categorized into the judge and skater groups, respectively. Both groups had similar athletic backgrounds. According to the Japan Skating Federation (JSF) technical test system, which evaluates skaters across nine grades (8, 7, 1, and beginner grades, ranked from highest to lowest), all participants had passed the grade 6 technical test but not the grade 7 test. Because the successful execution of a double Axel (2A) jump is required for grade 6 certification, all participants possessed equivalent athletic ability and SME relevant to the judging tasks. All three participants in the judge group completed JSF certification for judging qualifications, each obtaining a grade B qualification. Based on the five categorized levels (NR, N, A, B, and T, from high to low), judges with grade N qualification can officiate senior-class All-Japan Figure Skating Championships, those with grade A qualification can officiate senior-class East or West Japan Figure Skating Championships and All-Japan Junior and Novice Championships, and those with grade B qualification can officiate other lower competitions such as regional qualifying competitions across senior, junior, and novice levels as well as All Japan Intercollegiate Figure Skating Championships.

All participants involved in this study provided informed consent after being fully briefed on the study’s aims, procedures, and potential impacts. Before their participation, they were informed of their rights, including the freedom to withdraw from the study at any point without consequence. Each participant signed a consent form acknowledging their understanding and agreement to participate under these conditions.

## Video

The study utilized video recordings featuring 30 2A jumps from the ladies’ short program at the 2019 World Championship. Each selected jump had received a GOE score of 0 or higher from all nine official judges in the competition. Although the jump lasts only a few seconds from take-off to landing, judges must evaluate the overall performance, including the approach, take-off, air phase, and landing movements. Accordingly, each video clip was approximately 30 second to 1 minute in length, and was compiled from official footage provided on the International Skating Union’s (ISU) YouTube channel (International Skating Union, 2019).

Because the eye tracker used in the present study operated at 60 Hz, all video stimuli were converted to 30 frames per second (FPS) to synchronize temporal resolution between the gaze data and video playback. The original program music and audience sounds were retained; however, accompanying commentary and on-screen scores were removed to avoid potential bias in evaluation. Two videos (Videos 1 and 2) were created for this study, each containing the first 15 skaters and the last 15 skaters of the event, respectively, presented in the same order as the actual competition.

## Tasks

The participants completed two tasks in a fixed order:

1. Task 1: Consistent with official competition procedures, the participants assigned GOE scores for each jump on an 11-point scale from −5 to +5, including 0.
2. **Task 2: After completing Task 1, the** participants evaluated whether each jump met each of the six positive GOE criteria in separate judgments. This process was repeated for all six criteria, resulting in six evaluations per video clip for each participant.

As described by Kittel et al. (2019), video-based testing was employed because it provides a reliable and standardized means of assessing individual decision-making processes among sports officials. Moreover, off-ice video evaluation is a common practice in figure skating judge training.

## Eye Tracker

This study employed the Tobii Pro Spectrum (Tobii AB, Stockholm, Sweden) to track participants’ gaze coordinates for both eyes. According to the official specifications, the display size was 23.8 inches (527.0 × 296.5 mm), with a resolution of 1920 × 1080 pixels and a pixel pitch of 0.275 mm (Tobii, 2025). The data acquisition frequency was 60 Hz.

## Procedure

Before the experiment, the participants received the following information and instructions:

- GOE criteria (Table 1)
- Stimuli overview: The participants judged 30 senior-category ladies’ 2A jumps, all without under-rotation or other deductions affecting the base value.
- Evaluation protocol: The participants were instructed to wait until the response time appeared on the screen before beginning their evaluation, to observe each video attentively, and to move their eyes naturally without turning their heads.
- Practice session: Before the main experiment, the participants completed a practice session involving three jumps with GOE scores near zero. These clips served as the basis for judging this experiment and were excluded from the experiment video because some judges gave minus scores, even though the final GOE scores were close to zero. The actual GOE scores were 0.05, 0.05, and −0.05.

During the experiment, the participants first evaluated Video 1, which contained 15 jumps. Each jump was presented with a 15-second evaluation period followed by a 5-second interval. After a 10-minute break, the participants evaluated Video 2, which contained the same parameters as Video 1. Eye tracker calibration was performed before the participants viewed both videos.

## Parameters and Statistical Analysis

Based on the hypotheses discussed below, this study examined and analyzed the following four parameters:

- *Judging performance (GOE):* Judging accuracy was assessed using the mean absolute error (MAE) for each group, calculated relative to the official GOE scores from the 2019 World Championships. Official GOE scores represent the trimmed mean of the nine judges’ scores after excluding the highest and lowest values (International Skating Union, 2019).

Previous studies have shown that SME strongly influences judging accuracy (Pizzera et al., 2018). Because both the judge and skater groups in this study had similar athletic experience, minimal differences in judging performance were expected if SME were the dominant factor.
 A linear mixed model was used to examine group and individual differences. The fixed effects included participant attributes (judge or skater), while the random effects included participant ID (1–6) and jump video number (1–30). Analyses were performed using **R (v4.3.3)** with maximum-likelihood estimation. Statistical significance was set at p < 0.05.

- *Gaze coordinates:* Gaze coordinates reflect cognitive processes beyond attention, encompassing aspects such as perception, memory, and decision-making (Carter & Luke, 2020). Previous frame-by-frame analysis study of gaze distribution across body parts (Hirosawa et al., 2023) risked misclassification because visually close gaze positions may be assigned to different categories due to predefined segmentation. To achieve higher spatial precision, the present study quantified gaze consistency by calculating Euclidean distances between all possible participant pairs within each group (judges and skaters) for every video clip.

Because judges share professional training and were hypothesized to attend more consistently to visual cues relevant to GOE evaluation, the judge group was expected to exhibit smaller gaze dispersion (i.e., shorter Euclidean distances) than the skater group. The eye tracker recorded gaze data at 60 Hz, and the videos were presented at 30 FPS, resulting in two gaze samples corresponding to each video frame. Although the duration of each jump clip ranged from approximately 30 seconds to 1 minute, the analysis frames were standardized. The frame on which the blade completely left the ice was defined as the take-off frame, and 150 frames before take-off and 89 frames after landing were extracted, yielding a total of 240 frames for analysis. Accordingly**, each jump video clip contained 480 gaze samples.** Using these **480 gaze samples per video clip,** the two-dimensional gaze coordinates of the three members in each group were used to compute the Euclidean distances for three participant pairs (A–B, A–C, and B–C). In the equation below, i and j denote two different participants within the same group:

 （1）

 The overall spatial consistency of each group was then obtained by averaging these three pairwise distances across all video clips. The computational processing was performed using Python 3(3.10.12).

- *GOE scoring:* Following the scoring method performed in the actual competition, the participants assigned GOE scores from −5 to +5 for each jump. The judge group was hypothesized to exhibit lower individual variations in GOE scores due to their experience.
   The intraclass correlation coefficient (ICC(2,1)) (Shrout & Fleiss, 1979) of each group was calculated, and group differences were assessed using Python (3.10.12). Statistical significance was set at 5%. The ICC(2,1) of the actual GOE scores assigned by the nine international-level judges was also calculated as a reference.
- *Evaluation by GOE criterion*: The participants provided “yes” or “no” responses for each jump based on the specific GOE criterion being evaluated. The judge group was hypothesized to exhibit smaller individual variations due to their experience.
   As was done for GOE scoring, ICC(2,1) was calculated for each group, and group differences were assessed using Python (3.10.12). Statistical significance was set at 5%.

## Results Judging Performance

Table 2 presents the MAE of the GOE scores given by each participant compared with the GOE scores given by the judges during the competition, as reported previously (Hirosawa et al., 2023). Examination of the random-intercept model (Model 1) and random-intercept-slope model (Model 2) for random effects showed that Model 1 provided a better fit than Model 2. Overall, the skaters demonstrated greater judging accuracy than the judges, although fixed effects of the attributes were not significant. Meanwhile, random effects analysis indicated smaller individual differences in the intercepts of the participants than those of the jump videos, with almost no individual differences.

Table 2 Summary of judging performance results

| Participants | MAE ± SD | 95% CI |
| --- | --- | --- |
| Judge A | 1.181 ± 0.662 | 0.934–1.428 |
| Judge B | 0.986 ± 0.786 | 0.692–1.279 |
| Judge C | 1.010 ± 0.679 | 0.756–1.263 |
| Skater A | 0.871 ± 0.595 | 0.649–1.094 |
| Skater B | 0.900 ± 0.668 | 0.650–1.150 |
| Skater C | 0.971 ± 0.627 | 0.737–1.206 |
| Judges | 1.059 ± 0.107 | 0.794–1.323 |
| Skaters | 0.914 ± 0.052 | 0.786–1.042 |

MAE, mean absolute error; SD, standard deviation; CI, confidence interval

Table 3 Comparison of linear mixed model accuracy, and fixed and random effects on judgmental performance

| Model | AIC | BIC | p-value |  |
| --- | --- | --- | --- | --- |
| Model 1 | 377.550 | 393.515 |  |  |
| Model 2 | 383.261 | 411.998 | 0.683 |  |
| Fixed-effects | estimate | standard error | t-value | p-value |
| Attribute (skaters) | -0.145 | 0.097 | -1.487 | 0.139 |
| Random-effects | variance | standard deviation |  |  |
| Participants | 0.000 | 0.000 |  |  |
| Jump video | 0.037 | 0.191 |  |  |

AIC, Akaike information criterion; BIC, Bayesian information criterion

***Gaze coordinates***

Euclidean distances were calculated for each group using 2D gaze coordinates obtained from the eye tracker. The mean values of the two groups were compared. On average, the judge group exhibited shorter Euclidean distances, suggesting lesser individual variability in gazing coordinates compared with the skater group.

***Final GOE scoring***

The ICC for the final GOE scores was 0.336 (95% confidence interval [CI]: 0.10–0.57) for the judges and 0.409 (95% CI: 0.18–0.63) for the skaters. Although the point estimate was higher for the skaters, the wide and overlapping confidence intervals indicated that no clear group differences could be concluded.

***Evaluation according to each GOE criterion***

Table 4 presents the ICC(2,1) values for each GOE criterion. The judge group demonstrated higher values for five of the six criteria, except for Criterion 4 (steps before the jump, unexpected or creative entry), which showed a minimal group difference. Additionally, statistically significant ICC(2,1) values were observed in the judge group for Criteria 1–5. Both groups’ ICC(2,1) displayed statistically insignificant and small values for Criterion 6 (element matches the music), indicating large variability in the ratings. Interestingly, the order of ICC(2,1) values across criteria remained consistent for both groups (4 > 2 > 1 > 3 > 5 > 6).

Table 4 Comparison of Euclidean distances for two-dimensional (2D) gaze coordinates

|  | Euclidean distances of  2D gaze coordinates | Judges | Skaters |
| --- | --- | --- | --- |
|  | Participant A - Participant B | 116.48 ± 101.86 pixel  (3.20cm ± 2.80 cm) | 157.35 ± 146.82pixel  (4.33 ± 4.04cm) |
|  | Participant A - Participant C | 139.11 ± 121.28 pixel  (3.83 ± 3.34 cm) | 134.28 ± 130.41 pixel  (3.69 ± 3.59cm) |
|  | Participant B - Participant C | 122.84 ±103.58 pixel  (3.38 ± 2.85 cm) | 153.79 ± 156.90pixel  (4.23 ± 4.31cm) |
|  | Average | **126.15 ± 109.67 pixel**  **(3.47 ± 3.16 cm)** | 148.47 ± 145.47pixel  (4.08 ± 4.00cm) |

NOTE: Values for the groups with larger values are in bold.

Table 5 Comparison of inter-rater reliability of evaluation by final GOE and each GOE criterion

|  |  | Judges | | | Skaters | | |
| --- | --- | --- | --- | --- | --- | --- | --- |
|  | GOE guideline | ICC(2,1) | p-value | 95%CI | ICC(2,1) | p-value | 95%CI |
|  | Final GOE | 0.336 | 0.000*** | 0.10-0.57 | **0.409** | 0.000*** | 0.18-0.63 |
| 1 | Very good height and very good length | **0.334** | 0.001** | 0.11-0.56 | 0.301 | 0.003** | 0.08-0.54 |
| 2 | Good take-off and landing | **0.436** | 0.000*** | 0.22-0.65 | 0.373 | 0.000*** | 0.14-0.60 |
| 3 | Effortless throughout | **0.284** | 0.002** | 0.08-0.52 | 0.073 | 0.192 | -0.08-0.29 |
| 4 | Steps before the jump, unexpected or creative entry | 0.438 | 0.000*** | 0.21-0.65 | **0.446** | 0.000*** | 0.21-0.66 |
| 5 | Very good body position from take-off to landing | **0.239** | 0.009** | 0.04-0.47 | 0.047 | 0.217 | -0.06-0.22 |
| 6 | Element matches the music | **0.045** | 0.274 | -0.09-0.24 | -0.012 | 0.563 | -0.11-0.14 |
|  |  | *p < 0.05, **p < 0.01, ***p < 0.001 | | | | | |

NOTE: Values for the groups with larger values are in bold. GOE, grade of execution

# Discussion

This study investigated how judging experience affects individual differences in GOE evaluation of figure skating jumps, with all participants having similar athletic experience. Our findings revealed the following:

- Both groups exhibited comparable accuracy in judging GOE scores, with minimal individual variations.
- The judge group displayed shorter Euclidean distances in their gaze coordinates compared with the skater group.
- The skater group demonstrated less interrater variability in final GOE scores. Conversely, the judge group showed less variation in five of the six criteria based on individual GOE criterion evaluations.

Previous studies have shown that the judging accuracy of monitors is more strongly influenced by athletic experience than by judging experience (Pizzera, 2012; Pizzera & Raab, 2012). Accordingly, we expected that figure skating judges and skaters in our study with comparable athletic experience would demonstrate similar levels of judging accuracy. Indeed, our findings confirmed that the fixed effect of participant attributes (judge vs. skater) was not significant, consistent with previous studies. This suggests that monitors can leverage their athletic experience to evaluate both the negative and positive aspects of performance emphasized in the updated GOE criteria. Furthermore, the greater influence of the random effect of the jump video compared with the participant effect indicated that the specific jump being evaluated exerted more influence on GOE judgment than individual variability, supporting the robustness of the controlled experimental setting.

The analysis of gaze behavior revealed smaller Euclidean distances among gaze coordinates in the judge group compared with the skater group. A prior study reported that judges and skaters differ in the body areas they focus on during evaluation: while both groups primarily fixated on the upper body, skaters tended to focus more on the face, whereas judges concentrated on the lower body and skating boots(Hirosawa et al., 2023). However, the previous study did not address the spatial similarity of gaze locations among participants. In the present study, the smaller Euclidean distances observed within the judge group suggest that even novice-level judging experience may reduce individual spatial differences in where participants look during jump evaluation.

Regarding individual differences in jump GOE evaluation, the skater group exhibited smaller ICC(2,1) values for the final GOE score, whereas the judge group demonstrated significantly smaller individual variations for five of the six GOE criteria. These results indicate that novice judging experience did not contribute to reducing individual differences in evaluating the final GOE score; however, it can reduce individual differences regarding each evaluation criterion of GOE. Notably, Criterion 6 (element matches the music) showed the highest individual variability among all criteria, and novice judging experience reduced individual differences for Criteria 1, 2, 3, and 5. As the GOE guidelines (Table 1) state that Criteria 1–3 must be applied to achieve high GOE scores (+4 or +5), these three criteria are critical for evaluating jump performance. Consequently, this suggests that novice judges should prioritize acquiring a consistent understanding of these criteria as they gain experience. Regarding Criteria 3 (effortless throughout) and 5 (very good body position from takeoff to landing), the skater group showed low ICC(2,1) values, as opposed to the improved values and reduced individual differences in the judge group. The differences in judging experience were most apparent in the large individual differences between the two criteria. However, Criterion 6 exhibited low reliability and was not statistically significant in either group, even if the judge group's ICC(2,1) value (0.045) indicated larger individual differences compared with the skater group. Determining musical congruence remains a highly interpretive process for novice judges, underscoring the need for targeted training programs that promote a standardized understanding of how jump execution aligns with music.

For reference, the ICC(2,1) value calculated for the World Championship judges (n = 9) in final GOE scoring was 0.635 (p = 0.000, 95% CI [0.50–0.77]), which was higher than the values observed in both groups (judges and skaters) in the present study. However, direct comparison with actual competition judges is difficult due to differences in evaluation environments. Nevertheless, this supplementary evidence suggests that accumulated judging experience may contribute to improved consistency in performance evaluation.

Despite its insights, this study has some limitations. First, as a case study with a small sample size, future studies with larger sample sizes are needed to generalize the results. Specifically, this study considered only novice-level judging experience. Investigating how top-level international judges perceive and evaluate jump performance and assessing the extent of individual variations within this group are crucial for a more comprehensive understanding. The relatively small number of figure skating competitions and judges, as compared to other sports such as soccer, presents a challenge in addressing these limitations. As such, securing the cooperation of international and national federations is essential to facilitate larger-scale studies with higher-level judges. Additionally, in this study, the judge and skater groups were intentionally matched in terms of athletic ability. Thus, whether similar patterns of individual differences would emerge in groups with lower or higher levels of athletic ability remains unclear. As a methodological limitation, this study prioritized providing participants with a natural viewing environment to reduce their burden and, therefore, did not strictly control the height of the chair or the viewing distance from the monitor. Although previous studies have reported acceptable accuracy without the use of a chin rest, they also recommend this tool to stabilize head position and maximize measurement precision (Carter & Luke, 2020). Future studies examining gaze-position distributions in greater detail should use a chin rest.

Despite these limitations, to the best of our knowledge, our study is the first to clarify the relationship between novice judging experiences and individual differences in figure skating jump performance, providing a new perspective on the decision-making processes of sports officials.

# Conclusion This study examined the effect of novice judging experience on reducing individual differences in GOE evaluation of figure skating jumps, with a particular focus on positive evaluation criteria. The participants consisted of judges and skaters with comparable athletic experience. The results showed that novice judging experience did not reduce individual differences in final GOE scores. However, for five of the six GOE criteria, individual differences were smaller in the judge group than in the skater group, particularly for Criteria 3 (effortless throughout) and 5 (very good body position from takeoff to landing), indicating the impact of judging experience. Furthermore, the judge group showed greater consistency in gaze coordinates during jump evaluation, suggesting that consistency in evaluation for each GOE criterion may be linked to the consistency of gaze coordinates. These findings highlight the potential value of incorporating guidance that promotes consistent visual focus and attentional strategies into judge training programs.

# Funding details

No funding was received

# Disclosure statement

The authors report no potential competing interests.

# Data Availability Statement

The study participants did not give written consent for their data to be shared publicly; therefore, due to the sensitive nature of the research, supporting data are not available.

# References

Avugos, S., MacMahon, C., Bar-eli, M., & Raab, M. (2021). Inter-individual differences in sport refereeing: A review of theory and practice. *Psychology of Sport and Exercise*. https://doi.org/10.1016/J.PSYCHSPORT.2021.101926

Bassett, G. W., Jr, & Persky, J. (1994). Rating Skating. *Journal of the American Statistical Association*, *89*(427), 1075–1079. https://doi.org/10.1080/01621459.1994.10476845

Carter, B. T., & Luke, S. G. (2020). Best practices in eye tracking research. *International Journal of Psychophysiology: Official Journal of the International Organization of Psychophysiology*, *155*, 49–62. https://doi.org/10.1016/j.ijpsycho.2020.05.010

Findlay, L. C., & Ste-Marie, D. M. (2004). A Reputation Bias in Figure Skating Judging. *Journal of Sport and Exercise Psychology*, *26*(1), 154–166. https://doi.org/10.1123/jsep.26.1.154

Flessas, K., Mylonas, D., Panagiotaropoulou, G., Tsopani, D., Korda, A., Siettos, C., Di Cagno, A., Evdokimidis, I., & Smyrnis, N. (2015). Judging the judges’ performance in rhythmic gymnastics. *Medicine and Science in Sports and Exercise*, *47*(3), 640–648. https://doi.org/10.1249/MSS.0000000000000425

Hancock, D. J., Bennett, S., Roaten, H., Chapman, K., & Stanley, C. (2021). An Analysis of Literature on Sport Officiating Research. *Research Quarterly for Exercise and Sport*, *92*(4), 607–617. https://doi.org/10.1080/02701367.2020.1756198

Hancock, D. J., Rix-Lièvre, G., & Côté, J. (2015). Citation network analysis of research on sport officials: a lack of interconnectivity. *International Review of Sport and Exercise Psychology*, *8*(1), 95–105. https://doi.org/10.1080/1750984X.2015.1022202

Hirosawa, S. (2025, November 10). Can Machine Learning Robustly Predict Grade Execution Figure Skating Jumps from Kinematic Features Across Competitions-A Case Study Ladies’ Double Axel World Championships. *Research Square*. https://doi.org/10.21203/rs.3.rs-6233774/v1

Hirosawa, S., Kato, T., Yamashita, T., & Aoki, Y. (2023). Action Quality Assessment Model Using Specialists’ Gaze Location and Kinematics Data-Focusing on Evaluating Figure Skating Jumps. *Sensors* , *23*(22). https://doi.org/10.3390/s23229282

Hirosawa, S., Watanabe, M., & Aoki, Y. (2022). Determinant analysis and developing evaluation indicators of grade of execution score of double axel jump in figure skating. *Journal of Sports Sciences*, *40*(4), 470–481. https://doi.org/10.1080/02640414.2021.1997407

International Skating Union. (2018). *SINGLE & PAIR SKATING: Scale of Values, Levels of Difficulty and Guidelines for marking Grade of Execution, Season 2018/19 (Communication No. 2186)*. Isu.org. https://isu.org/inside-isu/isu-communications/communications/17795-2186-s-p-scale-of-values-levels-of-difficulty-and-guidelines-for-marking-goe-2018-19-replacing-2168/file

International Skating Union. (2019). *Ladies Short Program |2019 ISU World Figure Skating Championships Saitama JPN|*. YouTube. https://youtu.be/WKDXWfUW7W8

Kittel, A., Larkin, P., Elsworthy, N., & Spittle, M. (2019). Video-based testing in sporting officials: A systematic review. *Psychology of Sport and Exercise*, *43*, 261–270. https://doi.org/10.1016/j.psychsport.2019.03.013

Luis del Campo, V., & Espada Gracia, I. (2018). Exploring Visual Patterns and Judgments Predicated on Role Specificity: Case Studies of Expertise in Gymnastics. *Current Psychology* , *37*(4), 934–941. https://doi.org/10.1007/s12144-017-9572-1

Machida, T. (2020). *Artistic Sport Management: Interdisciplinary Studies Based on Figure Skating*. Hakusuisha.

Mack, M. (2020). Exploring Cognitive and Perceptual Judgment Processes in Gymnastics Using Essential Kinematics Information. *Advances in Cognitive Psychology / University of Finance and Management in Warsaw*, *16*(1), 34–44. https://doi.org/10.5709/acp-0282-7

Mack, M., Schmidt, M., & Heinen, T. (2021). The Relationship Between the Perceived Movement Quality and the Kinematic Pattern of Complex Skills in Gymnastics. *Journal of Human Kinetics*, *77*, 5–13. https://doi.org/10.2478/hukin-2021-0007

MacMahon, C., Mascarenhas, D., Plessner, H., Pizzera, A., Oudejans, R., & Raab, M. (2014). *Sports Officials and Officiating: Science and Practice*. Routledge. https://play.google.com/store/books/details?id=GyWcBQAAQBAJ

MacMahon, C., & Mildenhall, B. (2012). A Practical Perspective on Decision Making Influences in Sports Officiating. *International Journal of Sports Science & Coaching*, *7*(1), 153–165. https://doi.org/10.1260/1747-9541.7.1.153

Pizzera, A. (2012). Gymnastic judges benefit from their own motor experience as gymnasts. *Research Quarterly for Exercise and Sport*, *83*(4), 603–607. https://doi.org/10.1080/02701367.2012.10599887

Pizzera, A., Möller, C., & Plessner, H. (2018). Gaze behavior of gymnastics judges: Where do experienced judges and gymnasts look while judging? *Research Quarterly for Exercise and Sport*, *89*(1), 112–119. https://doi.org/10.1080/02701367.2017.1412392

Pizzera, A., & Raab, M. (2012). Perceptual Judgments of Sports Officials are Influenced by their Motor and Visual Experience. *Journal of Applied Sport Psychology*, *24*(1), 59–72. https://doi.org/10.1080/10413200.2011.608412

Plessner, H., Ermark, F., Schütz, L.-M., & Geoffrey Schweizer. (2023). Sports performance judgments - an update from a social cognitive perspective. *Asian Journal of Sport and Exercise Psychology*, *3*(1), 13–23. https://doi.org/10.1016/j.ajsep.2023.01.002

Rauer, T., Pape, H.-C., Knobe, M., Pohlemann, T., & Ganse, B. (2022). Figure skating: Increasing numbers of revolutions in jumps at the European and World Championships. *PloS One*, *17*(11), e0265343. https://doi.org/10.1371/journal.pone.0265343

Shrout, P. E., & Fleiss, J. L. (1979). Intraclass correlations: uses in assessing rater reliability. *Psychological Bulletin*, *86*(2), 420–428. https://doi.org/10.1037//0033-2909.86.2.420

Ste-Marie, D. M. (2000). Expertise in women’s gymnastic judging: an observational approach. *Perceptual and Motor Skills*, *90*(2), 543–546. https://doi.org/10.2466/pms.2000.90.2.543

Tobii, A. B. (2025, March). *Tobii Pro Spectrum user manual (Version 3.2)*. https://go.tobii.com/tobii-pro-spectrum-user-manual

Vincent Dumoulin, H. M. (2020). Accuracy and national bias of figure skating judges: The good, the bad and the ugly. *14th MIT Sloan Sports Analytics Conference*, PaperTrack:Business of sports ID1548706.

Wolframm, I., Reuter, P., Zaharia, I., & Vernooij, J. (2024). In the eye of the beholder-visual search behavior in equestrian dressage judges. *Animals: An Open Access Journal from MDPI*, *14*(14), 2025. https://doi.org/10.3390/ani14142025

Zitzewitz, E. (2006). Nationalism in winter sports judging and its lessons for organizational decision making. *Journal of Economics & Management Strategy*, *15*(1), 67–99. https://doi.org/10.1111/j.1530-9134.2006.00092.x

Zitzewitz, E. (2014). Does Transparency Reduce Favoritism and Corruption? Evidence From the Reform of Figure Skating Judging. *Journal of Sports Economics*, *15*(1), 3–30. https://doi.org/10.1177/1527002512441479

Ziv, G., Lidor, R., Zach, S., Brams, S., & Helsen, W. F. (2020). Gaze behavior of referees in sport-A review. *Frontiers in Sports and Active Living*, *2*, 572891. https://doi.org/10.3389/fspor.2020.572891
